# Supplementary material for: Two monoclonal antibodies against glycoprotein Gn protect mice from Rift Valley Fever challenge by cooperative effects
Source: PubMed Central journal article supplement (PMC7089562; doi:10.1371/journal.pntd.0008143), 2020-03-11
Supplement: pntd.0008143.s007.pdf [file pntd.0008143.s007.pdf]

Fig.1 ELISA fits:

| Gn3                  |                                    | Gn32                 |                                    | Gn3+Gn32             |                                    |
|----------------------|------------------------------------|----------------------|------------------------------------|----------------------|------------------------------------|
|                      | value                              |                      | value                              |                      | value                              |
| <b>npar</b>          | <b>4</b>                           | <b>npar</b>          | <b>4</b>                           | <b>npar</b>          | <b>4</b>                           |
| <b>params.bottom</b> | <b>4.14837e-02</b>                 | <b>params.bottom</b> | <b>4.62708e-02</b>                 | <b>params.bottom</b> | <b>3.79946e-02</b>                 |
| <b>params.top</b>    | <b>9.13609e-01</b>                 | <b>params.top</b>    | <b>9.46424e-01</b>                 | <b>params.top</b>    | <b>9.38683e-01</b>                 |
| <b>params.xmid</b>   | <b>8.61936e-02</b>                 | <b>params.xmid</b>   | <b>-4.27657e-01</b>                | <b>params.xmid</b>   | <b>-3.21513e-01</b>                |
| <b>params.sca1</b>   | <b>1.96978e+00</b>                 | <b>params.sca1</b>   | <b>1.59518e+00</b>                 | <b>params.sca1</b>   | <b>1.75559e+00</b>                 |
| params.s             | 1.00000e+00                        | params.s             | 1.00000e+00                        | params.s             | 1.00000e+00                        |
| GOF                  | 9.93557e-01                        | GOF                  | 9.89457e-01                        | GOF                  | 9.92697e-01                        |
| weightedGOF          | 9.99893e-01                        | weightedGOF          | 9.99814e-01                        | weightedGOF          | 9.99881e-01                        |
| stdErr               | 0.0316608                          | stdErr               | 0.04005807                         | stdErr               | 0.0339645                          |
| weighted stdErr      | 0.02761195                         | weighted stdErr      | 0.03609953                         | weighted stdErr      | 0.02937417                         |
| trapezoid            | 3.06068                            | trapezoid            | 3.64066                            | trapezoid            | 3.5009                             |
| Simpson              | 3.02756                            | Simpson              | 3.60647                            | Simpson              | 3.46675                            |
| xInfl                | 0.0861936                          | xInfl                | -0.427657                          | xInfl                | -0.321513                          |
| yInfl                | 0.477546                           | yInfl                | 0.496348                           | yInfl                | 0.488339                           |
| <b>Log10(EC50)</b>   | <b>0.1089195</b>                   | <b>Log10(EC50)</b>   | <b>-0.423238</b>                   | <b>Log10(EC50)</b>   | <b>-0.3086988</b>                  |
| <b>EC50</b>          | <b>1.28505e+00</b>                 | <b>EC50</b>          | <b>3.77365e-01</b>                 | <b>EC50</b>          | <b>4.91248e-01</b>                 |
| <b>[95%]</b>         | <b>[1.12456e+00   1.47372e+00]</b> | <b>[95%]</b>         | <b>[3.06354e-01   4.65456e-01]</b> | <b>[95%]</b>         | <b>[4.20256e-01   5.76991e-01]</b> |
| date (Y-m-d)         | 2019-04-02                         | date (Y-m-d)         | 2019-04-02                         | date (Y-m-d)         | 2019-04-02                         |
| nplr version         | 0.1.7 (2016-12-25)                 | nplr version         | 0.1.7 (2016-12-25)                 | nplr version         | 0.1.7 (2016-12-25)                 |
| R version            | 3.5.2 (2018-12-20)                 | R version            | 3.5.2 (2018-12-20)                 | R version            | 3.5.2 (2018-12-20)                 |

Fig. 3 SNT fits:

A MP12:

| Gn3                  |                                 | Gn3+Gn32             |                                    |
|----------------------|---------------------------------|----------------------|------------------------------------|
|                      | value                           |                      | value                              |
| <b>npar</b>          | <b>4</b>                        | <b>npar</b>          | <b>4</b>                           |
| <b>params.bottom</b> | <b>-1.82790e-03</b>             | <b>params.bottom</b> | <b>-9.60328e-04</b>                |
| <b>params.top</b>    | <b>1.01021e+00</b>              | <b>params.top</b>    | <b>1.01775e+00</b>                 |
| <b>params.xmid</b>   | <b>1.52787e+00</b>              | <b>params.xmid</b>   | <b>1.39401e+00</b>                 |
| <b>params.sca1</b>   | <b>8.96265e+00</b>              | <b>params.sca1</b>   | <b>5.05766e+00</b>                 |
| params.s             | 1.00000e+00                     | params.s             | 1.00000e+00                        |
| GOF                  | 9.95093e-01                     | GOF                  | 9.407e-01                          |
| weightedGOF          | 9.99906e-01                     | weightedGOF          | 9.98574e-01                        |
| stdErr               | 0.03365182                      | stdErr               | 0.1169808                          |
| weighted stdErr      | 0.01681304                      | weighted stdErr      | 0.06540513                         |
| trapezoid            | 0.480254                        | trapezoid            | 0.622314                           |
| Simpson              | 0.474988                        | Simpson              | 0.61411                            |
| xInfl                | 1.52787                         | xInfl                | 1.39401                            |
| yInfl                | 0.50419                         | yInfl                | 0.508393                           |
| <b>Log10(IC50)</b>   | <b>1.527067</b>                 | <b>Log10(IC50)</b>   | <b>1.391181</b>                    |
| <b>IC50</b>          | <b>3.36563e+01</b>              | <b>IC50</b>          | <b>2.4614e+01</b>                  |
| <b>[95%]</b>         | <b>[3.28416e+01   3.45e+01]</b> | <b>[95%]</b>         | <b>[2.09436e+01   2.87556e+01]</b> |
| date (Y-m-d)         | 2019-04-04                      | date (Y-m-d)         | 2019-04-04                         |
| nplr version         | 0.1.7 (2016-12-25)              | nplr version         | 0.1.7 (2016-12-25)                 |
| R version            | 3.5.2 (2018-12-20)              | R version            | 3.5.2 (2018-12-20)                 |

B

35/74

| Gn3                  | value                              | Gn3+Gn32             | value                              |
|----------------------|------------------------------------|----------------------|------------------------------------|
| <b>npar</b>          | <b>4</b>                           | <b>npar</b>          | <b>4</b>                           |
| <b>params.bottom</b> | <b>-1.53276e-03</b>                | <b>params.bottom</b> | <b>-3.43922e-04</b>                |
| <b>params.top</b>    | <b>9.12087e-01</b>                 | <b>params.top</b>    | <b>9.99470e-01</b>                 |
| <b>params.xmid</b>   | <b>2.15389e+00</b>                 | <b>params.xmid</b>   | <b>2.00262e+00</b>                 |
| <b>params.sca1</b>   | <b>6.09895e+00</b>                 | <b>params.sca1</b>   | <b>5.72752e+00</b>                 |
| params.s             | 1.00000e+00                        | params.s             | 1.00000e+00                        |
| GOF                  | 6.77302e-01                        | GOF                  | 5.64376e-01                        |
| weightedGOF          | 9.97917e-01                        | weightedGOF          | 9.95726e-01                        |
| stdErr               | 0.2728898                          | stdErr               | 0.3170623                          |
| weighted stdErr      | 0.07904551                         | weighted stdErr      | 0.1132374                          |
| trapezoid            | 0.573532                           | trapezoid            | 0.604966                           |
| Simpson              | 0.566938                           | Simpson              | 0.596906                           |
| xInfl                | 2.15389                            | xInfl                | 2.00262                            |
| yInfl                | 0.455277                           | yInfl                | 0.499563                           |
| <b>Log10(IC50)</b>   | <b>2.167875</b>                    | <b>Log10(IC50)</b>   | <b>2.002748</b>                    |
| <b>IC50</b>          | <b>1.47189e+02</b>                 | <b>IC50</b>          | <b>1.00635e+02</b>                 |
| <b>[95%]</b>         | <b>[1.05181e+02   2.09276e+02]</b> | <b>[95%]</b>         | <b>[6.92891e+01   1.45344e+02]</b> |
| date (Y-m-d)         | 2019-04-02                         | date (Y-m-d)         | 2019-04-02                         |
| np1r version         | 0.1.7 (2016-12-25)                 | np1r version         | 0.1.7 (2016-12-25)                 |
| R version            | 3.5.2 (2018-12-20)                 | R version            | 3.5.2 (2018-12-20)                 |

EC50 and IC50 values were obtained by fitting the data to a 4-Parameter Logistic Regression model using the np1r package in R.

Frederic Commo and Brian M. Bot (2016). np1r: N-Parameter Logistic Regression. R package version 0.1-7.  
<https://CRAN.R-project.org/package=np1r>

R Core Team (2018). R: A language and environment for statistical computing. R Foundation for Statistical Computing, Vienna, Austria. URL <https://www.R-project.org/>.

H. Wickham. ggplot2: Elegant Graphics for Data Analysis. Springer-Verlag New York, 2016.
